# Supplementary material
Source: PubMed Central journal article supplement (PMC3111294)
Supplement: 1103321108_pnas.201103321SI.pdf [file 1103321108_pnas.201103321SI.pdf]

# Supporting Information

Børud et al. 10.1073/pnas.1103321108

## SI Materials and Methods

**Bacterial Strains and Culture Conditions.** The bacterial strains used in this study are described in Table 1 and were grown on conventional GC medium as described previously (1). Protein glycosylation mutations (*pglA*, *pglC*, *pglE<sub>on</sub>*, *pglI*) were introduced into various strain backgrounds by using transformation as previously described (2, 3). Construction of the different *pglH* mutant strains is described later. The N400 *galE* mutants were made by transformation with MS11 *galE::cat* genomic DNA (4). The pPilE::cat plasmid was used to inactivate the WT *pilE* locus (5). Antibiotics were used for selection of transformants at the following concentrations: streptomycin, 750 µg/mL; erythromycin, 8 µg/mL; kanamycin, 50 µg/mL; and chloramphenicol, 10 µg/mL.

**Allelic Exchange of the *pgl* Locus.** The introduction of ST-640, FA1090, Z2491, and FAM18 *pgl* loci into N400 were performed through a two-step mutagenesis strategy that allowed gene replacement without introducing any selectable marker into the final strain (Fig. S1). The method uses a two-gene cassette containing both a selectable marker (*ermC'*) and a counter-selectable marker (*rpsL<sup>+</sup>*) (6). Genomic DNA from the strain of interest was then inserted into N400 by homologous recombination that replaced the *ermC'/rpsL<sup>+</sup>* cassette with the *pgl* locus from the strain of interest, and the final strain could be selected on streptomycin plates (7).

**Construction of *pglH* Mutants.** First, a pCRII-*pglH* plasmid was constructed by PCR-amplifying the whole *pglH* gene and surrounding sequences (2,523 bp) from FA1090 (*pglH* primers, forward, 5'-TCTGAATCAAGCGTCGCG-3'; reverse, 5'-TATCTGGCAGGCTGCATCCT-3') and inserting the PCR product into the pCRII-TOPO vector (Invitrogen). The *pglH* insert was cut out with *EcoRI* and ligated into the pUP6 *EcoRI* site, resulting in pUP6-*pglH*. Then, the *ermC'/rpsL<sup>+</sup>* cassette from pFLOB4300 was amplified (pUC primers, forward, *MluI*, 5'-CCGACGCGTCCCA-GTCACGACGTTGTAACG-3'; reverse, *MluI*, 5'-CCGACGCGTAGCGGATAACAATTCACACAGG-3'), and subsequently cloned into the *MluI* sites in pUP6-*pglH* plasmid, resulting in the pUP6-*pglH::ermC'/rpsL<sup>+</sup>* plasmid. Gonococci were then transformed with pUP6-*pglH::ermC'/rpsL<sup>+</sup>* and erythromycin-resistant *pglH* mutants were selected.

To introduce the H371R mutation into the endogenous site of *pglH<sub>FA1090</sub>*, the pCRII-*pglH* plasmid was mutated by using the specific primers containing the mutation (BP112, 5'-CGCCGCTTCAGGCGGACATTTCTATCG-3'/BP113, 5'-CGATAGGAAATGTCCGCGCCTGAAGCGGCG-3') and the Quik-Change XL Site-Directed Mutagenesis Kit (Agilent Technologies) as described in the manual. The mutation was then introduced into the FA1090 *pglH* strains by homologous recombination that replaced the *ermC'/rpsL<sup>+</sup>* cassette with *pglH<sub>FA1090 H371R}</sub>* from pCRII-*pglH<sub>FA1090 H371R}</sub>*.

**Complementation Analysis.** The *pglH<sub>FA1090}</sub>* gene was amplified with specific primers (BP102, 5'-CCTTAATTAATGAACAT-TACCATAGCCGC-3'; BP103, 5'-CCAATGCATCTCATTG-CCAATCTTTCAA-3') containing *NsiI* and *PacI* restriction sites, and subcloned into the plasmid pGCC6, digested with *NsiI* and *PacI*. The *pglH* gene from FA1090 was there inserted at an intergenic chromosomal site located between the *lctP* and *aspC* genes and linked to a chloramphenicol resistance cassette (8, 9) in the pGCC6::*pglH<sub>FA1090}</sub>* plasmid. To do complementation analysis, this plasmid was then transformed into gonococci

and selected on plates containing chloramphenicol. Additionally, pGCC6::*pglH<sub>FAM18}</sub>* (BP104, 5'-CCTTAATTAATGAACAT-TACCATCGTCGC-3'; BP105, 5'-CCAATGCATTTTCATGAGC-TAATCTTTCAA-3'), pGCC6::*pglH<sub>Z2491}</sub>* (BP100, 5'-CCTT-AATTAATGAACATCACCATAGTCGC-3'; BP105), and pGCC6::*pglH<sub>ST640}</sub>* (BP100/BP101, 5'-CCAATGCATTTTCAT-CAGCTAATCTTTCAA-3') were constructed and transformed into gonococci by using the same approach. Introduction of mutations into pGCC6::*pglH<sub>FA1090 H371R}</sub>* (BP112/BP113), pGCC6::*pglH<sub>FAM18 R373H}</sub>* (BP118, 5'-CGCCGCTTCAAACAC-GACGTTGCCTATC-3'; BP119, 5'-GATAGGCAACGTCG-TGTTTGAAGCGGCG-3'), pGCC6::*pglH<sub>Z2491 R371H}</sub>* (BP116, 5'-CGCCGCTTCAGGACGACATTTCTAT-3'; BP117, 5'-ATAGGAAATGTCCGTCGCTGAAGCGGCG-3'), and pGCC6::*pglH<sub>ST640 R373H}</sub>* (BP118/BP119) was performed by using the specific primers with the mutation (shown in parents) and the Quik-Change XL Site-Directed Mutagenesis Kit (Agilent Technologies) as described in the manual.

**Monosaccharide Analysis.** The samples were subjected to methanolysis with 4 M HCl in anhydrous MeOH for 24 h at 80 °C (10, 11). Mannitol was used as an internal standard. After the methanolysis, the reagents were removed under a stream of N<sub>2</sub>, and the methyl glycosides were dried in vacuum over P<sub>2</sub>O<sub>5</sub> for at least 1 h before conversion into the corresponding trimethylsilyl derivatives. The samples were subjected to capillary gas chromatography (6000 Vegas Series 2; Carlo Erba) as described previously (11).

**Development of Glycan-Specific Rabbit Polyclonal Antibodies.** Polyclonal antibodies (pDAb2 and pGAb2) were generated by rabbit immunization by using pili purified from the strain N400 *pgl<sub>Z2491 pglA</sub>* or N400 *pgl<sub>FAM18 pglA</sub>* that expresses the protein-linked PglH made diNacBac or GATDH disaccharides, respectively (Agrisera). Solid-phase affinity purification was done by immunoblotting a whole-cell lysate from the strain expressing the respective glycan and incubating with pDAb2 or pGAb2 (1:2,000 dilutions).

**Protein Expression and Purification.** *PglH* from *N. meningitidis* strain Z2491 was amplified by PCR and inserted into *BamHI/XhoI* in the pMAL-c2X vector. This construct encoded for the addition of an N-terminal MBP. PglH was heterologously over-expressed in the *E. coli* BL21-Gold (DE3) strain (Agilent). An overnight culture of cells was prepared, and 5 mL was used to inoculate 1 L of Luria-Bertani media at 37 °C with shaking. After the cells reached an optical density of approximately 0.8 absorbance units, the temperature was lowered to 16 °C and the cells were induced with 0.5 mM IPTG. After growth for 16 to 18 h with shaking, the cells were harvested and the pellets were stored at -80 °C.

The glycosyltransferase PglH was expressed as a MBP fusion protein, and this tag was used to purify the protein by using amylose resin (New England Biolabs). A 1-L cell pellet was solubilized in 40 mL of buffer containing 50 mM Tris (pH 8.0), 150 mM NaCl, and 5% glycerol, and then lysed by sonication. The lysate was cleared by centrifugation (145,000 × g) for 65 min at 4 °C. Cleared lysate was mixed with 2 mL of amylose resin and tumbled for 30 min at 4 °C and then packed into a K 9/15 column (GE Healthcare). By using gravity flow, the resin-bound protein was washed with 20 column volumes of the lysate buffer. The protein was then eluted in the same buffer supplemented with

10 mM maltose, and 10 mL fractions were collected. Fractions containing purified material were assessed by SDS/PAGE (12%). The purified protein contains two lower molecular weight bands that are both immunoreactive with anti-MBP antibody, suggesting that they are truncation products produced during overexpression (Fig. S3). The full-length protein is the most abundant band and consists of more than 60% of the total protein content. The first three fractions were concentrated to 3 mL with Amicon Ultra-15 Centrifugal Filter units (Millipore) and stored at  $-20^{\circ}\text{C}$  in the presence of 30% glycerol. The concentration was determined by using the appropriate extinction coefficient at a UV absorbance of 280 nm. The calculated protein concentration overestimated the amount of full-length protein, as a result of the presence of truncation products.

**In Vitro Radioactivity-Based Assay.** The ability of PglH to transfer UDP-Glc, UDP-Gal, UDP-GlcNAc, UDP-GalNAc, and GDP-Man was analyzed by using a radioactivity-based assay. To separate the radiolabeled Und-PP-disaccharide from excess of the labeled NDP sugars, the reactions were quenched in organic solvent, which allows for extraction of the hydrophobic undecaprenyl substrate. Repeated aqueous washes removed all of the excess aqueous-soluble NDP sugar.

The assays contained 3% DMSO, 0.05% dodecyl maltoside, 50 mM  $\text{MgCl}_2$ , 30 mM Tris-acetate, pH 8.0, 10  $\mu\text{M}$  Und-PP-diNAcBac, 2  $\mu\text{M}$  NDP sugar (20 mCi/mmol), 9  $\mu\text{M}$  MBP-PglH, and water to a final volume of 100  $\mu\text{L}$ . Und-PP-diNAcBac was

prepared biosynthetically as previously described (12, 13). The reactions were initiated by the addition of enzyme and were monitored by quenching 15- $\mu\text{L}$  aliquots at 2, 4, 6, 8, and 10 min into 1 mL of 2:1 chloroform:methanol and washing three times with 400  $\mu\text{L}$  of an aqueous mixture composed of 1.83 g of potassium chloride dissolved in 235 mL water, 240 mL chloroform, and 15 mL methanol. The radioactivity present in the organic and aqueous layers was detected by using a LS6500 scintillation counter (Beckman); organic samples were dried and resuspended in 200  $\mu\text{L}$  Solvable (Perkin-Elmer) and 5 mL of scintillation fluid (Opti-Fluor; Perkin-Elmer). Aqueous samples were mixed with 5 mL of Ecolite (MP Biomedicals) before counting. The assays with each sugar were performed in triplicate.

To prepare Und-PP-diNAcBac-Glc, the product of PglH, for subsequent labeling with fluorescent 2-AB, the reaction was performed in the absence of radiolabeled substrate. The reaction contained 3% DMSO, 0.1% DDM, 50 mM  $\text{MgCl}_2$ , 30 mM Tris (pH 8.0), 20  $\mu\text{M}$  Und-PP-diNAcBac, 20  $\mu\text{M}$  UDP-Glc, 10  $\mu\text{M}$  PglH, and water to a final volume of 100  $\mu\text{L}$ . The disaccharide was cleaved from the polyprenol and labeled with 2-AB as described previously (14). The labeling reaction was cleaned with GlycoClean S Cartridges (Prozyme) before purification using the normal phase GlycoSep N HPLC column (Prozyme) following previously established protocols (14). MALDI MS was used to verify the identity of the purified 2-AB-labeled disaccharide product (Fig. S3).

1. Freitag NE, Seifert HS, Koomey M (1995) Characterization of the *pilF-pilD* pilus assembly locus of *Neisseria gonorrhoeae*. *Mol Microbiol* 16:575–586.
2. Aas FE, et al. (2006) *Neisseria gonorrhoeae* type IV pili undergo multisite, hierarchical modifications with phosphoethanolamine and phosphocholine requiring an enzyme structurally related to lipopolysaccharide phosphoethanolamine transferases. *J Biol Chem* 281:27712–27723.
3. Aas FE, Vik A, Vedde J, Koomey M, Egge-Jacobsen W (2007) *Neisseria gonorrhoeae* O-linked pilin glycosylation: Functional analyses define both the biosynthetic pathway and glycan structure. *Mol Microbiol* 65:607–624.
4. Robertson BD, Frosch M, van Putten JP (1993) The role of *galE* in the biosynthesis and function of gonococcal lipopolysaccharide. *Mol Microbiol* 8:891–901.
5. Hegge FT, et al. (2004) Unique modifications with phosphocholine and phosphoethanolamine define alternate antigenic forms of *Neisseria gonorrhoeae* type IV pili. *Proc Natl Acad Sci USA* 101:10798–10803.
6. Johnston DM, Cannon JG (1999) Construction of mutant strains of *Neisseria gonorrhoeae* lacking new antibiotic resistance markers using a two gene cassette with positive and negative selection. *Gene* 236:179–184.
7. Børud B, et al. (2010) Genetic, structural, and antigenic analyses of glycan diversity in the O-linked protein glycosylation systems of human *Neisseria* species. *J Bacteriol* 192:2816–2829.
8. Mehr IJ, Long CD, Serkin CD, Seifert HS (2000) A homologue of the recombination-dependent growth gene, *rdgC*, is involved in gonococcal pilin antigenic variation. *Genetics* 154:523–532.
9. Mehr IJ, Seifert HS (1998) Differential roles of homologous recombination pathways in *Neisseria gonorrhoeae* pilin antigenic variation, DNA transformation and DNA repair. *Mol Microbiol* 30:697–710.
10. Chambers RE, Clamp JR (1971) An assessment of methanolysis and other factors used in the analysis of carbohydrate-containing materials. *Biochem J* 125:1009–1018.
11. Barsett H, Smedstad Paulsen B (1992) Separation, isolation and characterization of acidic polysaccharides from the inner bark of *Ulmus glabra* Huds. *Carbohydr Polym* 17:137–144.
12. Glover KJ, Weerapana E, Imperiali B (2005) *In vitro* assembly of the undecaprenylpyrophosphate-linked heptasaccharide for prokaryotic N-linked glycosylation. *Proc Natl Acad Sci USA* 102:14255–14259.
13. Olivier NB, Chen MM, Behr JR, Imperiali B (2006) *In vitro* biosynthesis of UDP-N,N'-diacetylglucosamine by enzymes of the *Campylobacter jejuni* general protein glycosylation system. *Biochemistry* 45:13659–13669.
14. O'Reilly MK, Zhang G, Imperiali B (2006) *In vitro* evidence for the dual function of Alg2 and Alg11: essential mannosyltransferases in N-linked glycoprotein biosynthesis. *Biochemistry* 45:9593–9603.
15. Chaudhuri RR, Pallen MJ (2006) xBASE, a collection of online databases for bacterial comparative genomics. *Nucleic Acids Res* 34(Database issue):D335–D337.
16. Thompson JD, Higgins DG, Gibson TJ (1994) CLUSTAL W: Improving the sensitivity of progressive multiple sequence alignment through sequence weighting, position-specific gap penalties and weight matrix choice. *Nucleic Acids Res* 22:4673–4680.

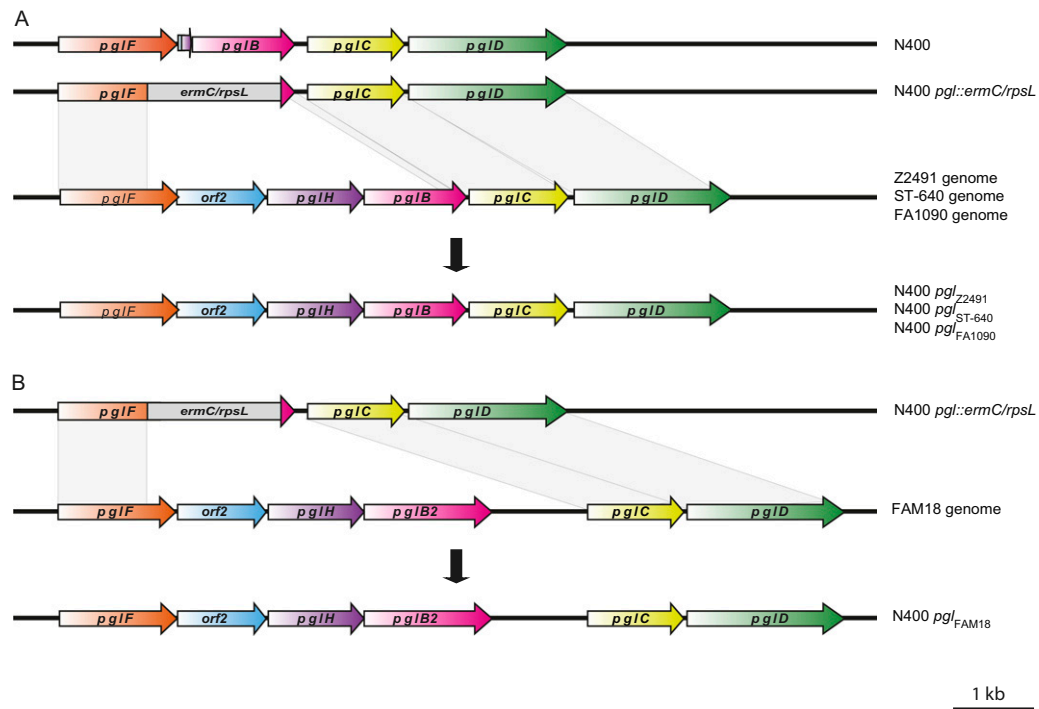

**Fig. S1.** Strategy for construction of strains with variant *pgI* loci. Different *pgI* loci were introduced into strain N400 (and its derivative 4/3/1) by using a two-step allelic exchange strategy that allowed gene replacement. The method uses a gene cassette containing both a selectable marker (*ermC*) and a counter-selectable marker (*rpsL*<sup>\*</sup>) (6, 7). Genomic DNA from strains of interest was used to transform the recipient, selecting for streptomycin resistance and scoring for sensitivity to erythromycin. (A) The Z2491, ST-640, and FA1090 *pgI* loci all have the *pgIB* allele (in addition to ORFs 2 and 3), (B) whereas the FAM18 *pgI* locus has the *pgIB2* allele (and therefore synthesizes GATDH rather than diNAcBac-based glycoforms). The gray shaded area indicates regions allowing homologous recombination.

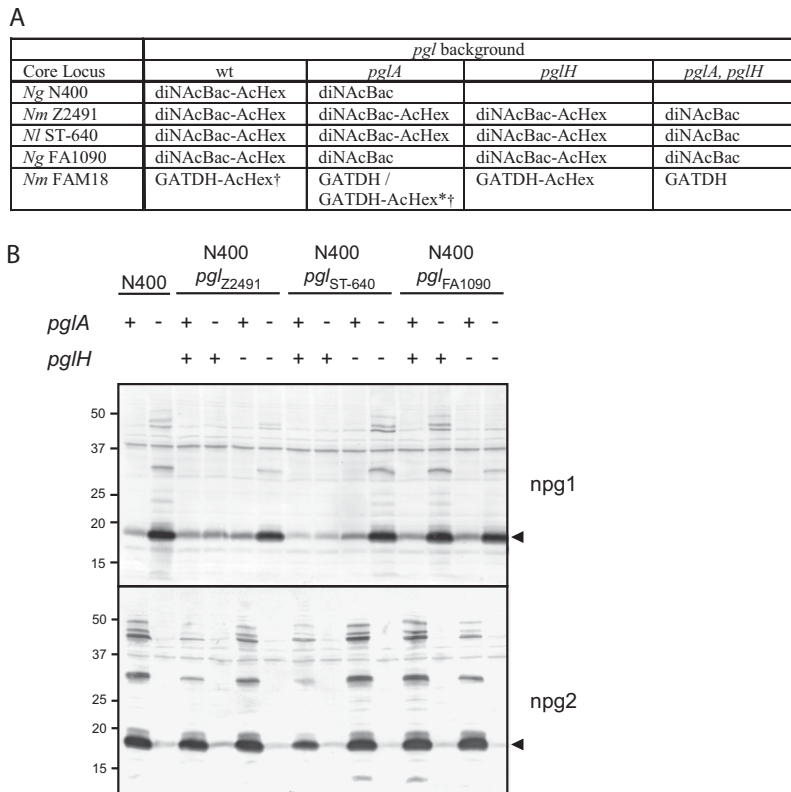

**Fig. 52.** The *pglH* gene is associated with altered disaccharide glycan composition. (A) ESI MS analysis of intact Pile were carried out to characterize the glycan structure (Fig. 2 and Table 1). The table summarizes different glycan forms synthesized by strains with various *pgl* backgrounds. *Ng*, *N. gonorrhoeae*, *Nm*, *N. meningitidis*, *Nl*, *N. lactamica*; \*Mixture of mono- and disaccharide glycoforms. †Reduced acetylation. (B) Immunoblotting of whole-cell lysates from isogenic strains with different *pgl* backgrounds used glycan-specific monoclonal antibodies npg1 and npg2, recognizing diNAcBac monosaccharide and diNAcBac-Gal disaccharide glycoforms, respectively (7). As shown for the controls (two leftmost lanes) using strain N400 (that expresses PglA but lacks *pglH*), glycoproteins react with npg2 (indicative of diNAcBac-Gal modification). Inactivation of *pglA* in that background leads to a loss of npg2 reactivity and gain of npg1 reactivity (indicative of diNAcBac monosaccharide modification). Inactivation of *pglA* in backgrounds carrying active alleles of *pglH* fails to engender npg1 reactivity, thus indicating the absence of the diNAcBac monosaccharide modification. This phenotype is directly caused by PglH, as inactivation of *pglH* restored npg1 reactivity in these backgrounds. Moreover, strains expressing the PglH-associated disaccharide fail to react with npg2. Strains expressing active forms of PglA reacted with npg2, whereas strains in which *pglA* was mutated failed to react with mono- or disaccharide-specific antibodies, demonstrating that PglH is responsible for an antigenically different disaccharide than PglA. Consistent with its inactivity in disaccharide synthesis as seen by MS, the *pglH*<sub>FA1090</sub> allele is not associated with this phenotype. Minus signs denote *pglA::kan* or *pglH::ermClrpsL*; plus signs denote intact *pglA* or *pglH*. Strains used are KS100 (N400), KS141 (N400 *pglA*), KS369 (N400 *pgl*<sub>Z2491</sub>), KS370 (N400 *pgl*<sub>Z2491</sub> *pglA*), KS371 (N400 *pgl*<sub>Z2491</sub> *pglH*), KS372 (N400 *pgl*<sub>Z2491</sub> *pglA* *pglH*), KS351 (N400 *pgl*<sub>ST-640</sub>), KS352 (N400 *pgl*<sub>ST-640</sub> *pglA*), KS353 (N400 *pgl*<sub>ST-640</sub> *pglH*), KS354 (N400 *pgl*<sub>ST-640</sub> *pglA* *pglH*), KS378 (N400 *pgl*<sub>FA1090</sub>), KS379 (N400 *pgl*<sub>FA1090</sub> *pglA*), KS380 (N400 *pgl*<sub>FA1090</sub> *pglH*), and KS381 (N400 *pgl*<sub>FA1090</sub> *pglA* *pglH*). Arrow denotes the position of the major glycoprotein Pile.

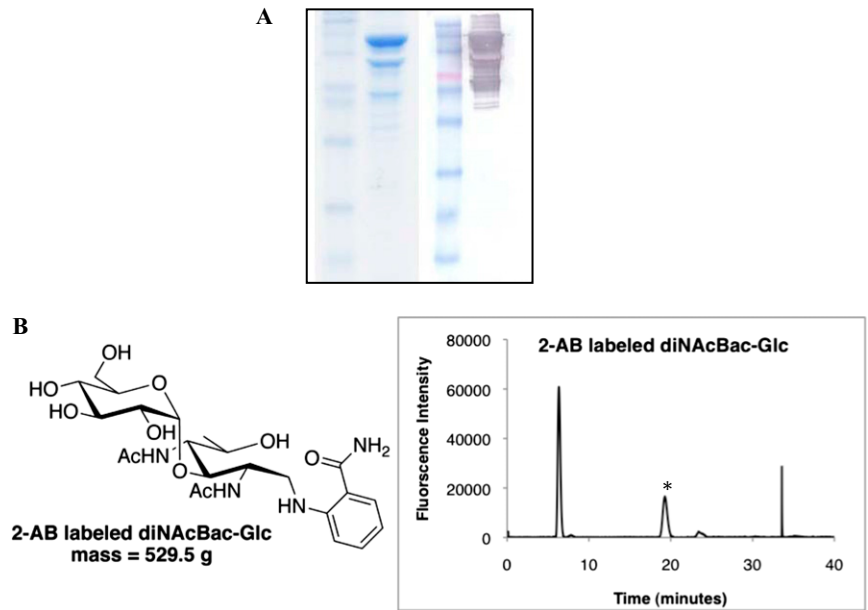

**Fig. 53.** (A) Characterization of the purified, recombinant MBP-PglH fusion protein. In SDS/PAGE (Left) and immunoblot (Right) analyses, the uppermost band corresponds to the molecular weight of the MBP-PglH construct and is the predominant protein band in the sample. MBP antibody was used to confirm the presence of the fusion tag MBP appended to PglH. Other bands also reacted with the MBP antibody and represent truncation products accumulated during expression. The Benchmark Pre-Stained Protein Ladder (Invitrogen) was used as a standard in the first lane. (B) Normal phase HPLC with fluorescence detection of 2-AB-labeled diNAcBac-Glc. To confirm that the product of PglH is diNAcBac-Glc, the glycan was hydrolyzed from the undecaprenyl-pyrophosphate linker and labeled with 2-AB. The diNAcBac-Glc retention time (asterisk) is consistent with other disaccharides, and MALDI MS confirmed the identity of the separated fluorescent product.

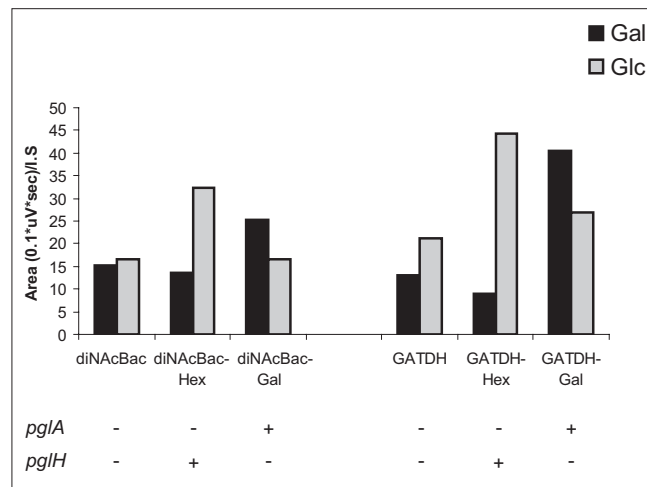

**Fig. 54.** Monosaccharide analyses are consistent with the finding that PglH transfers glucose to diNAcBac and GATDH. Relative amounts of galactose and glucose associated with purified pili as determined by gas chromatography after methanolysis and trimethylsilyl derivatization. Strains used are KS372 (N400 *pgl<sub>Z2491</sub> pglA pglH*), KS370 (N400 *pgl<sub>Z2491</sub> pglA*), and KS371 (N400 *pgl<sub>Z2491</sub> pglH*) to synthesize diNAcBac, diNAcBac-Glc, and diNAcBac-Gal, respectively. KS363 (N400 *pgl<sub>FAM18</sub> pglA pglH*), KS361 (N400 *pgl<sub>FAM18</sub> pglA*), and KS362 (N400 *pgl<sub>FAM18</sub> pglH*) synthesize GATDH, GATDH-Glc, and GATDH-Gal, respectively. The results are presented as the area under peak (0.1\* $\mu$ V\*s) relative to the internal standard mannitol run together with each sample.



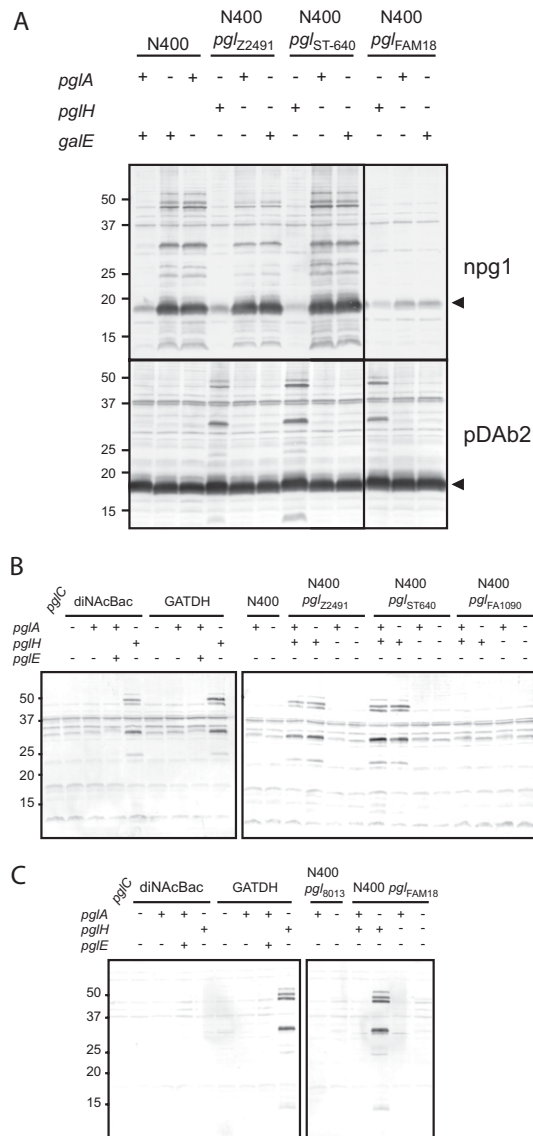

**Fig. S5.** (A) *galE* is epistatic to *pglA* but not to *pglH*. Immunoblotting of whole-cell lysates from isogenic strains with different *pgl* backgrounds used the glycan-specific monoclonal antibody npg1 and the polyclonal pDAb2 antibody, recognizing diNAcBac monosaccharide and diNAcBac-Glc disaccharide glycoforms, respectively. Minus signs denote *pglA::kan*, *pglH::ermC/rpsL* or *galE::cat*. Plus signs denote intact *pglA*, *pglH*, or *galE*. Note that inactivation of *galE* in N400 leads to glycoprotein reactivity with npg1 despite the presence of active *pglA*, whereas it has no effect on glycoprotein reactivity with the pDAb2 antibody in the strains expressing *pglH*. Strains used are KS100 (N400), KS141 (N400 *pglA*), KS442 (N400 *galE*), KS374 (N400 *pgl<sub>Z2491</sub>* *pglA galE*), KS375 (N400 *pgl<sub>Z2491</sub>* *pglH galE*), KS372 (N400 *pgl<sub>Z2491</sub>* *pglA pglH*), KS356 (N400 *pgl<sub>ST-640</sub>* *pglA galE*), KS357 (N400 *pgl<sub>ST-640</sub>* *pglH galE*), KS354 (N400 *pgl<sub>ST-640</sub>* *pglA pglH*), KS365 (N400 *pgl<sub>FAM18</sub>* *pglA galE*), KS366 (N400 *pgl<sub>FAM18</sub>* *pglH galE*), and KS363 (N400 *pgl<sub>FAM18</sub>* *pglA pglH*). Arrow points to the major glycoprotein PiIE. (B, C) PglH-derived disaccharides are uniquely immunogenic and antigenic. (B) Immunoblots of whole cell-lysates from strains with defined *pgl* backgrounds were probed with pDAb2, polyclonal antiserum raised against pili bearing the PglH-derived disaccharide diNAcBac-Glc. pDAb2 reactivity was specific to both PglH-derived glycans, diNAcBac-Glc and GATDH-Glc. Minus signs denote *pglA::kan*, *pglH::ermC/rpsL* or *pglE<sub>off</sub>*. Plus signs denote intact *pglA*, *pglH*, or *pglE<sub>on</sub>*. A *pglC*-null mutant was used as a negative control (far left lane). The strains used were (Left) KS105 (4/3/1 *pglC*), KS122 (4/3/1 *pglA*), KS101 (4/3/1), KS127 (4/3/1 *pglE<sub>on</sub>*), KS400 (N400 *pgl<sub>Z2491</sub>*, *pglA pilE*), KS312 (4/3/1 *pglB<sub>28013</sub>* *pglA*), KS311 (4/3/1 *pglB<sub>28013</sub>*), KS310 (4/3/1 *pglB<sub>28013</sub>* *pglE<sub>on</sub>*), and KS394 (N400 *pgl<sub>FAM18</sub>* *pglA, pilE*); and (Right) KS101 (4/3/1), KS122 (4/3/1 *pglA*), KS399 (N400 *pgl<sub>Z2491</sub>* *pilE*), KS400 (N400 *pgl<sub>Z2491</sub>* *pglA pilE*), KS401 (N400 *pgl<sub>Z2491</sub>* *pglH pilE*), KS402 (N400 *pgl<sub>Z2491</sub>* *pglA pglH pilE*), KS387 (N400 *pgl<sub>ST-640</sub>* *pilE*), KS388 (N400 *pgl<sub>ST-640</sub>* *pglA pilE*), KS389 (N400 *pgl<sub>ST-640</sub>* *pglH pilE*), KS390 (N400 *pgl<sub>ST-640</sub>* *pglA pglH pilE*), KS405 (N400 *pgl<sub>FA1090</sub>* *pilE*), KS406 (N400 *pgl<sub>FA1090</sub>* *pglA pilE*), KS407 (N400 *pgl<sub>FA1090</sub>* *pglH pilE*), and KS408 (N400 *pgl<sub>FA1090</sub>* *pglA pglH pilE*). (C) Immunoblots of whole-cell lysates from strains with defined *pgl* backgrounds were probed with pGAb2, polyclonal antiserum raised against pili bearing the PglH-derived disaccharide GATDH-Glc. pGAb2 reactivity was specific to strains expressing PglB2 and PglH. Minus signs denote *pglA::kan*, *pglH::ermC/rpsL* or *pglE<sub>off</sub>*. Plus signs denote intact *pglA*, *pglH*, or *pglE*. A *pglC*-null mutant was used as a negative control (far left lane). Strains used were (Left) KS105 (4/3/1 *pglC*), KS122 (4/3/1 *pglA*), KS101 (4/3/1), KS127 (4/3/1 *pglE<sub>on</sub>*), KS400 (N400 *pgl<sub>Z2491</sub>*, *pglA pilE*), KS312 (4/3/1 *pglB<sub>28013</sub>* *pglA*), KS311 (4/3/1 *pglB<sub>28013</sub>*), KS310 (4/3/1 *pglB<sub>28013</sub>* *pglE<sub>on</sub>*), and KS394 (N400 *pgl<sub>FAM18</sub>* *pglA, pilE*); and (Right) KS311 (4/3/1 *pglB<sub>28013</sub>*), KS312 (4/3/1 *pglB<sub>28013</sub>* *pglA*), KS393 (N400 *pgl<sub>FAM18</sub>* *pilE*), KS394 (N400 *pgl<sub>FAM18</sub>* *pglA pilE*), KS395 (N400 *pgl<sub>FAM18</sub>* *pglH pilE*), and KS396 (N400 *pgl<sub>FAM18</sub>* *pglA pglH pilE*).

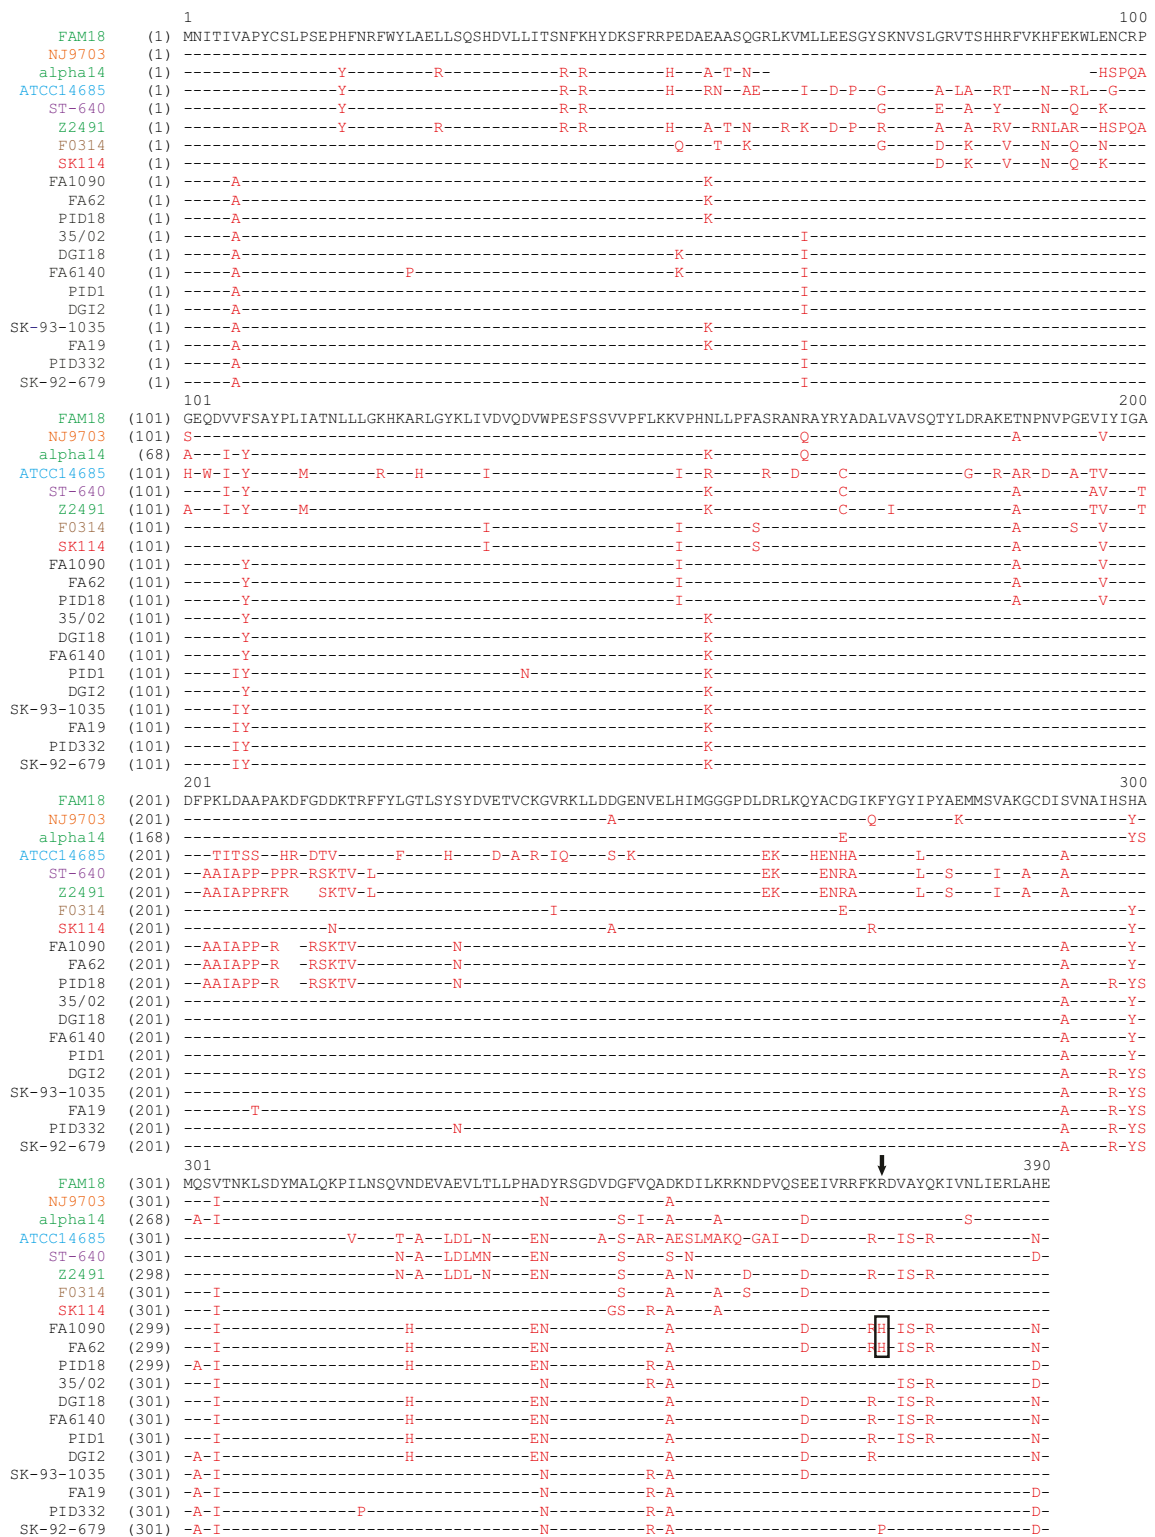

**Fig. S6.** Amino acid sequence alignment of PglH proteins. PglH from strain FAM18 was used as consensus sequence. Amino acid differences are shown in red and identical amino acids are represented by minus signs. The critical amino acid, histidine 371, in FA1090 is boxed. National Center for Biotechnology Information protein accession numbers are shown in parentheses: *N. gonorrhoeae* strains (shown in black) 35/02 (ZP\_06128240.1), DGI18 (ZP\_04720314.1), DGI2 (ZP\_06570304.1), FA1090 (YP\_207259.1), FA62 (ZP\_06641922.1), FA19 (ZP\_06130290.1), FA6140 (ZP\_04722383.1), PID1 (ZP\_06137079.1), PID18 (ZP\_06134762.1), PID332 (ZP\_06148242.1), SK-92-679 (ZP\_06150409.1), SK-93-1035 (ZP\_06152714.1); *N. meningitidis* strains (shown in green) alpha14 (YP\_003082587.1), FAM18 (YP\_974510.1), Z2491 (YP\_002342109.1), *Neisseria cinerea* ATCC 14685 (shown in blue; ZP\_05982849.1), *Neisseria* sp. oral taxon 014 str. F0314 (shown in brown; ZP\_06981261.1), *N. subflava* NJ9703 (shown in orange; ZP\_05985778.1), *Neisseria flavescens* SK114 (shown in red; ZP\_04757589.1), and *N. lactamica* ST-640 [shown in purple; named NLA17570 in xBASE (15)]. Alignment was made with AlignX in Vector NTI Advance 11 (Invitrogen) that uses a modified ClustalW algorithm (16).

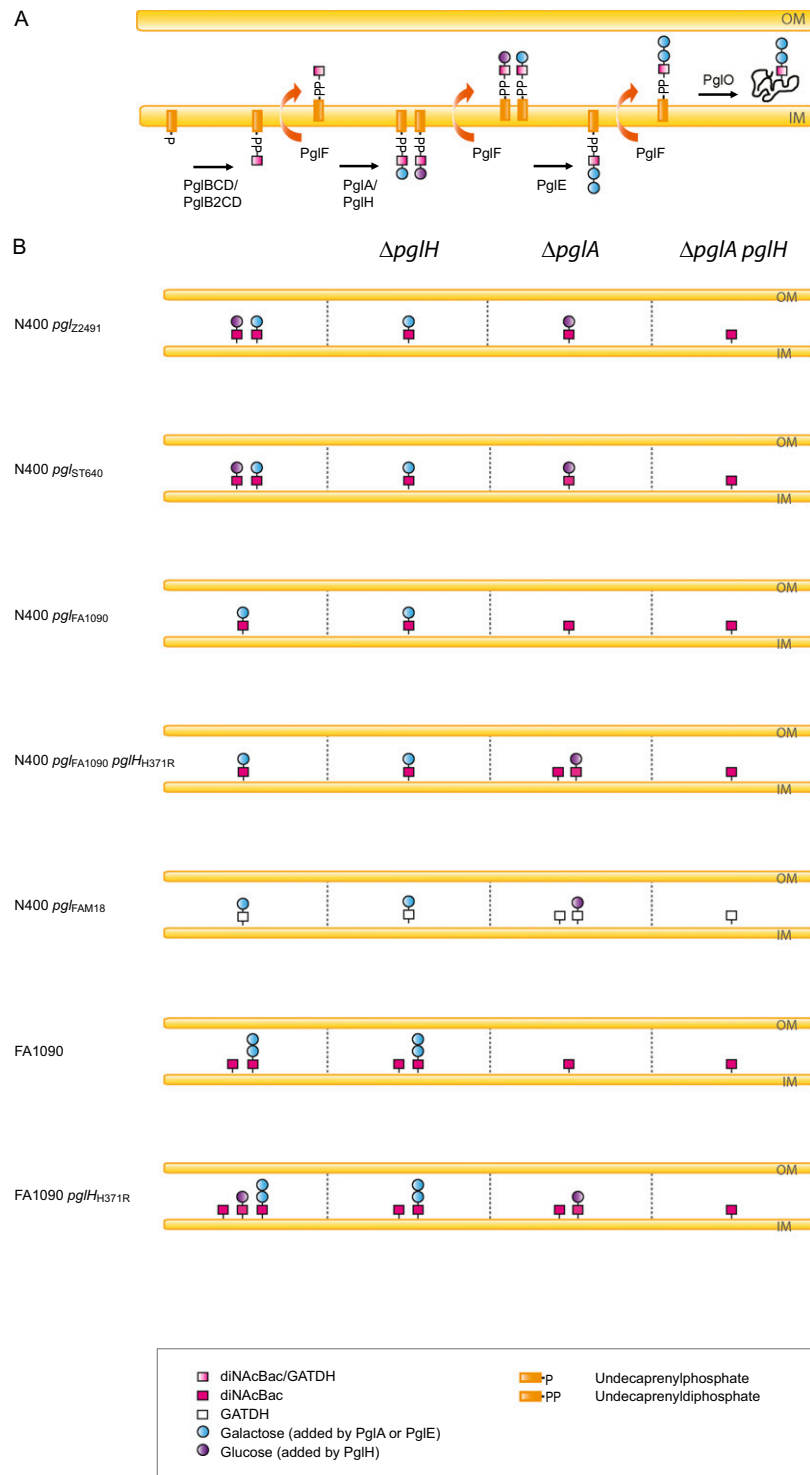

**Fig. S7.** (A) Revised O-linked protein glycosylation pathway in *Neisseria* species including the PglH glycosyltransferase. (B) Influence of select *pglA* and *pglH* alleles on glycoform expression in defined genetic backgrounds. Shown are the UndPP-associated glycoforms expressed in each instance.



**Table S1. *Neisseria* strains and *pgl* genotypes**

| Strain                                                         | Accession no.  | <i>orf2</i> | <i>pglH</i> | <i>pglA</i> | <i>pglE</i> | <i>pglB</i>  | Origin |
|----------------------------------------------------------------|----------------|-------------|-------------|-------------|-------------|--------------|--------|
| <i>N. gonorrhoeae</i>                                          |                |             |             |             |             |              |        |
| FA1090                                                         | NC_002946.2    | ON          | ON          | ON          | ON (-PV)    | <i>pglB</i>  | DGI    |
| F62                                                            | ADAA01000005.1 | ON          | ON          | ON (-PV)    | ON (-PV)    | <i>pglB</i>  | UI     |
| PID1                                                           | ABZM01000034.1 | OFF         | ON (-PV)    | ON (-PV)    | OFF         | <i>pglB</i>  | PID    |
| FA6140                                                         | ABZI01000024.1 | OFF         | ON (-PV)    | OFF         | ON          | <i>pglB</i>  | ES     |
| PID24-1                                                        | ABZN01000022.1 | OFF         | ON (-PV)    | OFF         | OFF         | <i>pglB</i>  | PID    |
| DGI18                                                          | ABZH01000024.1 | OFF         | ON (-PV)    | OFF         | OFF         | <i>pglB</i>  | DGI    |
| PID332                                                         | ABZO01000041.1 | OFF         | ON          | ON (-PV)    | OFF         | <i>pglB</i>  | PID    |
| 35/02                                                          | ABZG01000029.1 | OFF         | ON (-PV)    | ON (-PV)    | OFF         | <i>pglB</i>  |        |
| SK-93-1035                                                     | ABZQ01000041.1 | ON          | ON (-PV)    | OFF         | OFF         | <i>pglB</i>  | DGI    |
| SK-92-679                                                      | ABZP01000038.1 | OFF         | ON (-PV)    | ON          | OFF         | <i>pglB</i>  | DGI    |
| FA19                                                           | ABZJ01000029.1 | OFF         | ON (-PV)    | OFF         | OFF         | <i>pglB</i>  | UI     |
| PID18                                                          | ABZL01000024.1 | OFF         | ON          | ON (-PV)    | OFF         | <i>pglB</i>  | PID    |
| DGI2                                                           | ACIG01000103.1 | OFF         | ON (-PV)    | ON (-PV)    | OFF         | <i>pglB</i>  | DGI    |
| MS11                                                           | ABZK01000025.1 | —           | —           | ON (-PV)    | OFF         | <i>pglB</i>  | UI     |
| NCCP11945                                                      | NC_011035.1    | —           | —           | ON (-PV)    | OFF         | <i>pglB</i>  |        |
| 1291                                                           | ABZF01000025.1 | —           | —           | ON (-PV)    | OFF         | <i>pglB</i>  | GU     |
| <i>N. lactamica</i>                                            |                |             |             |             |             |              |        |
| ST-3787/ATCC 23970                                             | ACEQ02000033.1 | OFF         | OFF         | ON          | ON          | <i>pglB</i>  | C      |
| ST-640                                                         | NC_014752.1    | OFF         | ON          | OFF         | ON          | <i>pglB</i>  | C      |
| Y92-1009                                                       | CACL01000022.1 | OFF         | ON          | ON          | OFF         | <i>pglB</i>  | C      |
| NS19                                                           | AEPI01000013.1 | OFF         | OFF         | OFF         | OFF         | <i>pglB</i>  | C      |
| <i>N. meningitidis</i>                                         |                |             |             |             |             |              |        |
| H44/76                                                         | AEQZ01000037.1 | —           | —           | ON          | OFF         | <i>pglB</i>  | IMD    |
| MC58                                                           | NC_003112.2    | —           | —           | ON          | OFF         | <i>pglB</i>  | IMD    |
| ATCC 13091                                                     | AEEF01000085.1 | ON          | OFF         | OFF         | OFF         | <i>pglB</i>  |        |
| K1207                                                          | ADWM01000120.1 | OFF         | ON (-PV)    | ON          | OFF         | <i>pglB2</i> | IMD    |
| S0108                                                          | ADWN01000126.1 | ON          | ON (-PV)    | OFF         | OFF         | <i>pglB2</i> | IMD    |
| Z2491                                                          | NC_003116.1    | OFF         | ON          | ON          | ON          | <i>pglB</i>  | IMD    |
| 053442                                                         | NC_010120.1    | ON          | OFF         | ON          | OFF         | <i>pglB2</i> | IMD    |
| NS44                                                           | AEPJ01000151.1 | ON          | OFF         | ON          | OFF         | <i>pglB2</i> |        |
| FAM18                                                          | NC_008767.1    | OFF         | ON (-PV)    | OFF         | OFF         | <i>pglB2</i> | IMD    |
| ALPHA14                                                        | NC_013016.1    | OFF         | ON (-PV)    | ON          | OFF         | <i>pglB</i>  | HC     |
| 8013                                                           | FM999788       | —           | —           | OFF         | OFF         | <i>pglB2</i> | IMD    |
| M6190                                                          | AEQF01000040.1 | OFF         | ON (-PV)    | ON          | OFF         | <i>pglB2</i> | IMD    |
| ES14902                                                        | AEQI01000038.1 | OFF         | ON (-PV)    | ON          | OFF         | <i>pglB2</i> | IMD    |
| M0579                                                          | AEQH01000026.1 | OFF         | OFF         | OFF         | OFF         | <i>pglB2</i> | IMD    |
| OX99.30304                                                     | AEQE01000110.1 | OFF         | OFF         | OFF         | OFF         | <i>pglB2</i> | HC     |
| 961-5945                                                       | AEQK01000132.1 | ON          | ON          | ON          | ON          | <i>pglB2</i> | IMD    |
| M13399                                                         | AEQG01000039.1 | —           | —           | ON          | OFF         | <i>pglB</i>  | IMD    |
| N1568                                                          | AEQD01000080.1 | —           | —           | OFF         | OFF         | <i>pglB2</i> | IMD    |
| CU385                                                          | AEQJ01000044.1 | —           | —           | ON          | OFF         | <i>pglB</i>  | IMD    |
| M01-240013                                                     | AEQL01000047.1 | —           | —           | OFF         | ON          | <i>pglB</i>  | IMD    |
| <i>N. flavescens</i> NRL30031/H210                             |                |             |             |             |             |              |        |
|                                                                | ACEN01000095.1 | ON          | OFF         | —           | —           | <i>pglB</i>  | C      |
| <i>N. flavescens</i> SK114                                     |                |             |             |             |             |              |        |
|                                                                | ACQV01000018.1 | ON          | ON (-PV)    | —           | —           | <i>pglB2</i> | C      |
| <i>Neisseria subflava</i> NJ9703                               |                |             |             |             |             |              |        |
|                                                                | ACEO02000013.1 | ON          | ON (-PV)    | —           | —           | <i>pglB2</i> | C      |
| <i>Neisseria mucosa</i> C102                                   |                |             |             |             |             |              |        |
|                                                                | ACRG01000017.1 | ON          | ON (-PV)    | —           | —           | <i>pglB2</i> | C      |
| <i>Neisseria mucosa</i> ATCC 25996                             |                |             |             |             |             |              |        |
|                                                                | ACDX02000011.1 | ON          | ON (-PV)    | —           | —           | <i>pglB2</i> | C      |
| <i>Neisseria sicca</i> DS1                                     |                |             |             |             |             |              |        |
|                                                                | AEPG01000397.1 | ON          | ON (-PV)    | —           | —           | <i>pglB2</i> | C      |
| <i>Neisseria sicca</i> 4320                                    |                |             |             |             |             |              |        |
|                                                                | AEPF01000056.1 | ON          | ON (-PV)    | —           | —           | <i>pglB2</i> | C      |
| <i>Neisseria sicca</i> ATCC 29256                              |                |             |             |             |             |              |        |
|                                                                | ACKO02000014.1 | ON          | ON (-PV)    | —           | —           | <i>pglB2</i> | C      |
| <i>Neisseria polysaccharea</i> NS342                           |                |             |             |             |             |              |        |
|                                                                | AEPH01000240.1 | ON          | ON (-PV)    | —           | OFF         | <i>pglB</i>  | C      |
| <i>Neisseria polysaccharea</i> ATCC 43768                      |                |             |             |             |             |              |        |
|                                                                | ADBE01000085.1 | —           | —           | OFF         | ON          | <i>pglB</i>  | C      |
| <i>N. cinerea</i> ATCC 14685                                   |                |             |             |             |             |              |        |
|                                                                | ACDY02000005.1 | ON          | ON (-PV)    | —           | —           | <i>pglB</i>  | C      |
| <i>Neisseria</i> sp. oral taxon 014 str. F0314                 |                |             |             |             |             |              |        |
|                                                                | ADEA01000027.1 | ON          | ON (-PV)    | —           | —           | <i>pglB2</i> | C      |
| <i>Neisseria elongata</i> subsp. <i>glycolytica</i> ATCC 29315 |                |             |             |             |             |              |        |
|                                                                | ADBF01000031.1 | ON          | OFF         | —           | —           | <i>pglB</i>  | C      |
| <i>Neisseria bacilliformis</i> ATCC BAA-1200                   |                |             |             |             |             |              |        |
|                                                                | AFAY01000015.1 | ON          | ON (-PV)    | —           | —           | <i>pglB</i>  | C      |

C, commensal strain; DGI, disseminated Gonococcal infection; ES, epidemic strain; GU, Gonococcal urethritis; HC, healthy carrier; IMD, invasive Meningococcal disease; PID, pelvic inflammatory disease; UI, uncomplicated infection; (-PV), not phase variable.

**Table S2. Complete list of PiIE modifications and corresponding masses *m/z***

| Modifications present     | MW of PiIE, Da*           | Modifications present  | MW of PiIE, Da*           |
|---------------------------|---------------------------|------------------------|---------------------------|
| None                      | 17,179 <sup>†</sup>       | —                      | —                         |
| 1PE                       | 17,302                    | —                      | —                         |
| 2PE                       | 17,425                    | —                      | —                         |
| diNAcBac                  | 17,407                    | GATDH                  | 17,453                    |
| diNAcBac- Hex             | 17,569                    | GATDH-Hex              | 17,615                    |
| diNAcBac-GalNAc           | 17,610                    | GATDH-GalNAc           | 17,656                    |
| diNAcBac-AcHex            | 17,611                    | GATDH-AcHex            | 17,657                    |
| diNAcBac-AcGalNAc         | 17,652                    | GATDH-AcGalNAc         | 17,698                    |
| diNAcBac-HexHex           | 17,732                    | GATDH-HexHex           | 17,778                    |
| diNAcBac-HexGalNAc        | 17,773                    | GATDH-HexGalNAc        | 17,819                    |
| diNAcBac-HexAcHex         | 17,774                    | GATDH-HexAcHex         | 17,820                    |
| diNAcBac-HexAcGalNAc      | 17,815                    | GATDH-HexAcGalNAc      | 17,861                    |
| 1PE, diNAcBac             | 17,530                    | 1PE, GATDH             | 17,576                    |
| 1PE, diNAcBac- Hex        | 17,692                    | 1PE, GATDH-Hex         | 17,738                    |
| 1PE, diNAcBac-GalNAc      | 17,733                    | 1PE, GATDH-GalNAc      | 17,779                    |
| 1PE, diNAcBac-AcHex       | 17,734                    | 1PE, GATDH-AcHex       | 17,780                    |
| 1PE, diNAcBac-AcGalNAc    | 17,775                    | 1PE, GATDH-AcGalNAc    | 17,821                    |
| 1PE, diNAcBac-HexHex      | 17,855                    | 1PE, GATDH-HexHex      | 17,901                    |
| 1PE, diNAcBac-HexGalNAc   | 17,896                    | 1PE, GATDH-HexGalNAc   | 17,942                    |
| 1PE, diNAcBac-HexAcHex    | 17,897                    | 1PE, GATDH-HexAcHex    | 17,943                    |
| 1PE, diNAcBac-HexAcGalNAc | 17,938                    | 1PE, GATDH-HexAcGalNAc | 17,984                    |
| 2PE, diNAcBac             | 17,653                    | 2PE, GATDH             | 17,699                    |
| 2PE, diNAcBac-Hex         | 17,815                    | 2PE, GATDH-Hex         | 17,861                    |
| 2PE, diNAcBac-GalNAc      | 17,856                    | 2PE, GATDH-GalNAc      | 17,902                    |
| 2PE, diNAcBac-AcHex       | 17,857                    | 2PE, GATDH-AcHex       | 17,903                    |
| 2PE, diNAcBac-AcGalNAc    | 17,898                    | 2PE, GATDH-AcGalNAc    | 17,944                    |
| 2PE, diNAcBac-HexHex      | 17,978                    | 2PE, GATDH-HexHex      | 18,024                    |
| 2PE, diNAcBac-HexGalNAc   | 18,019                    | 2PE, GATDH-HexGalNAc   | 18,065                    |
| 2PE, diNAcBac-HexAcHex    | 18,020                    | 2PE, GATDH-HexAcHex    | 18,066                    |
| 2PE, diNAcBac-HexAcGalNAc | 18,061                    | 2PE, GATDH-HexAcGalNAc | 18,107                    |
|                           | <i>m/z</i> of oxonium ion |                        | <i>m/z</i> of oxonium ion |
| diNAcBac                  | 229.1                     | GATDH                  | 275.2                     |
| Ac2GalNAc                 | 288.2                     | Ac2GalNAc              | —                         |
| diNAcBac-Hex              | 391.1                     | GATDH-Hex              | 437.2                     |
| diNAcBac-GalNAc           | 432.2                     | GATDH-GalNAc           | —                         |
| diNAcBac-AcHex            | 433.2                     | GATDH-AcHex            | 479.2                     |
| diNAcBac-AcGalNAc         | 474.2                     | GATDH-AcGalNAc         | —                         |
| diNAcBac-Ac2GalNAc        | 516.2                     | GATDH-Ac2GalNAc        | —                         |
| diNAcBac-HexHex           | 553.2                     | GATDH-HexHex           | —                         |
| diNAcBac-HexGalNAc        | 594.2                     | GATDH-HexGalNAc        | —                         |
| diNAcBac-HexAcHex         | 595.2                     | GATDH-HexAcHex         | —                         |
|                           | 636.2                     | GATDH-HexAcGalNAc      | —                         |

Hex, hexose; GalNAc, *N*-acetyl galactosamine; Ac, acetyl-group.

\*Detected or expected molecular weight in ESI MS.

<sup>†</sup>Calculated theoretical molecular weight of 17,178.5 (including one intramolecular disulfide bridge).
